# Supplementary material for: Kif2a regulates spindle organization and cell cycle progression in meiotic oocytes
Source: PubMed Central journal article supplement (PMC5171826; doi:10.1038/srep38574), 2016-12-19
Supplement: srep38574-s1.pdf [file srep38574-s1.pdf]

# **Kif2a regulates spindle organization and cell cycle progression in meiotic oocytes**

**Authors:** Zi-Yun Yi<sup>1</sup>, Xue-Shan Ma<sup>2</sup>, Qiu-Xia Liang<sup>2</sup>, Teng Zhang<sup>2</sup>, Zhao-Yang Xu<sup>2</sup>, Tie-Gang Meng<sup>2</sup>, Ying-Chun Ouyang<sup>2</sup>, Yi Hou<sup>2</sup>, Heide Schatten<sup>3</sup>, Qing-Yuan Sun<sup>2</sup> & Song Quan<sup>1</sup>

## **Author affiliations:**

<sup>1</sup>Center for Reproductive Medicine; Department of Ob/Gy; Nanfang Hospital; Southern Medical University; Guangzhou City, 510515 China;

<sup>2</sup>State Key Laboratory of Stem Cells and Reproductive Biology, Institute of Zoology, Chinese Academy of Sciences, Beijing, 100101 China;

<sup>3</sup>Department of Veterinary Pathobiology, University of Missouri, Columbia, MO 65211, USA

Correspondence and requests for materials should be addressed to S.Q. (email: [quansong2008@gmail.com](mailto:quansong2008@gmail.com)) or Q.Y.S. (email: [sunqy@ioz.ac.cn](mailto:sunqy@ioz.ac.cn)).

**Supplementary Information:**

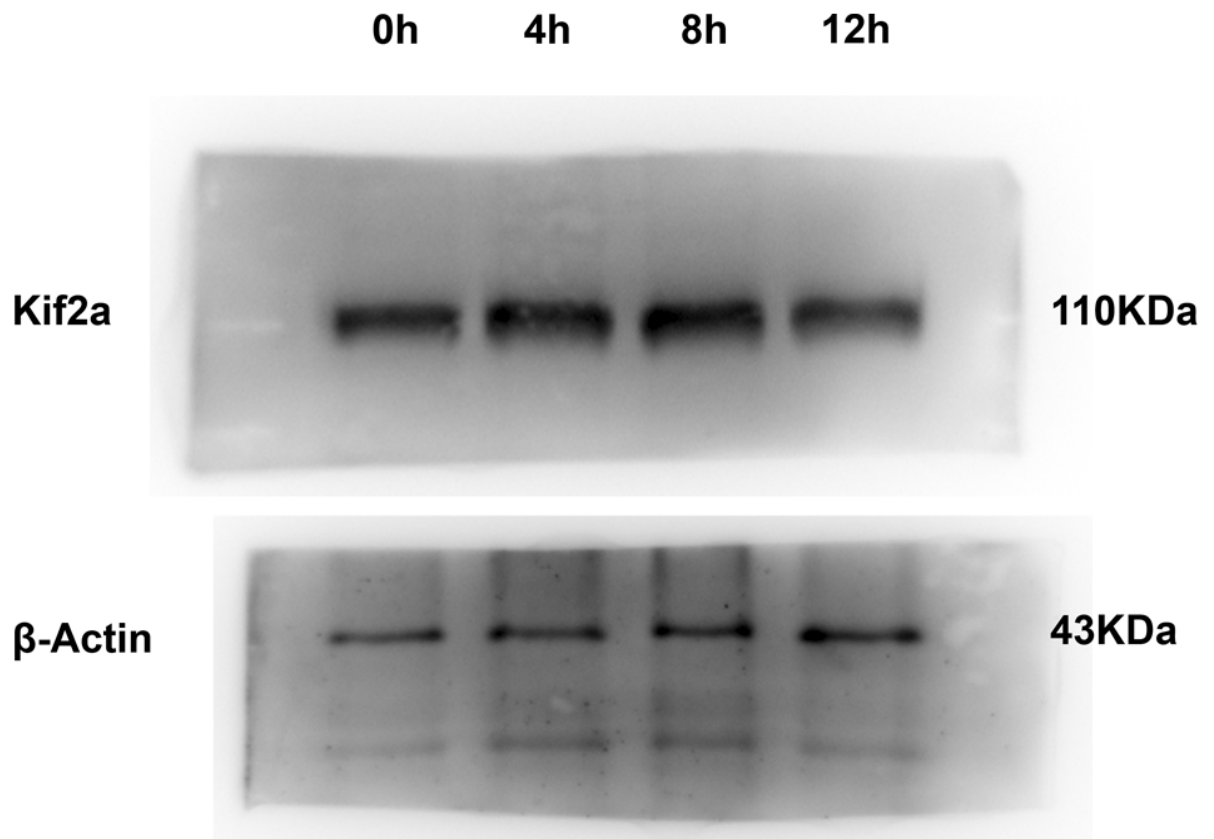

**Supplementary Figure 1.** Expression and subcellular localization of Kif2a during mouse oocyte meiotic maturation. Oocytes were collected after culture for 0, 4, 8, 12h, corresponding to the GV, Pro-M I , M I and M II stages, respectively. The molecular weight of Kif2a and  $\beta$ -actin were 110kDa and 43kDa, respectively. Each sample contained 200 oocytes.

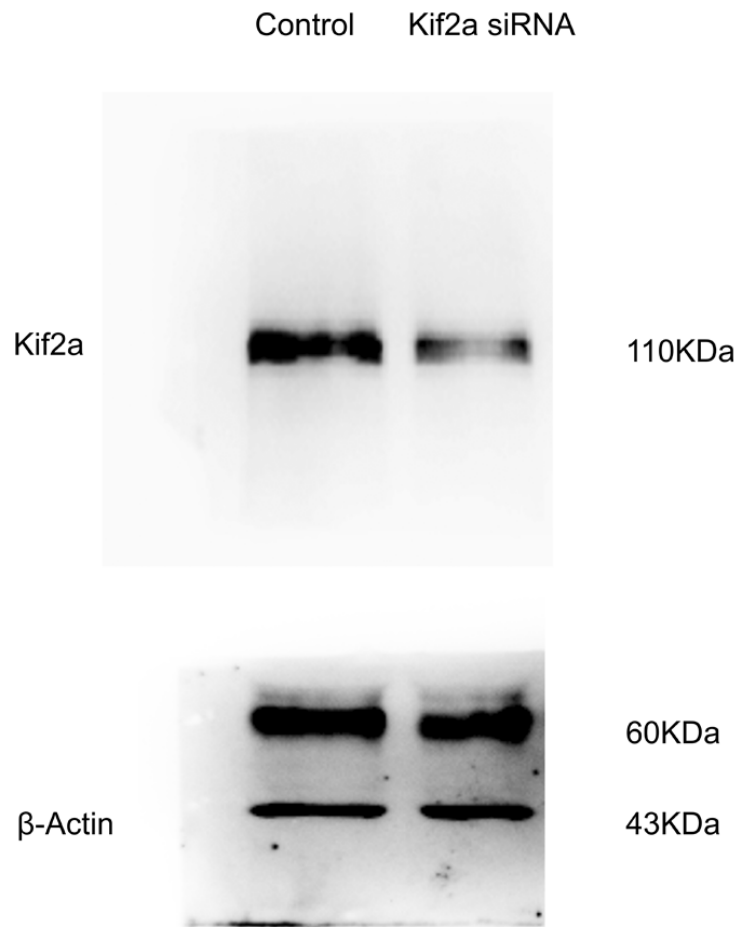

**Supplementary Figure 2.** Western blotting results for Kif2a after siRNA injection were Full-length gels. After microinjection of Kif2a or control siRNA , oocytes were incubated in M2 medium containing 100 $\mu$ m IBMX for 24h, then washed 5 times and placed in IBMX-free M2 medium for 8h, followed by Western blotting.
